# Supplementary material for: Fabrication of ZnS/SnO nanowire/nanosheet hierarchical nanoheterostructure and its photoluminescence properties
Source: Royal Society of Chemistry journal article supplement (doi:10.1039/c2ce26053k), 2012-01-01
Supplement: c2ce26053k.pdf [file c2ce26053k.pdf]

Supplementary Information to

**Fabrication of string-like ZnS/SnO nanowire/nanosheet  
hierarchical nanoheterostructure and its photoluminescence  
properties**

**Changyong Lan,<sup>\*a</sup> Jiangfeng Gong<sup>b</sup>, Yuwen Jiang<sup>c</sup> and Qingping Ding<sup>a</sup>**

<sup>a</sup> *School of Physical Electronics, University of Electronic Science and Technology of China, Chengdu 610054, China. Fax: 86 28 83202590; Tel: 86 28 83202130; E-mail: cylanscc@gmail.com*

<sup>b</sup> *Department of Physics, Hohai University, Nanjing 210098, China*

<sup>c</sup> *National Laboratory of Solid State Microstructures and School of Physics, Nanjing University, Nanjing 210093, China*

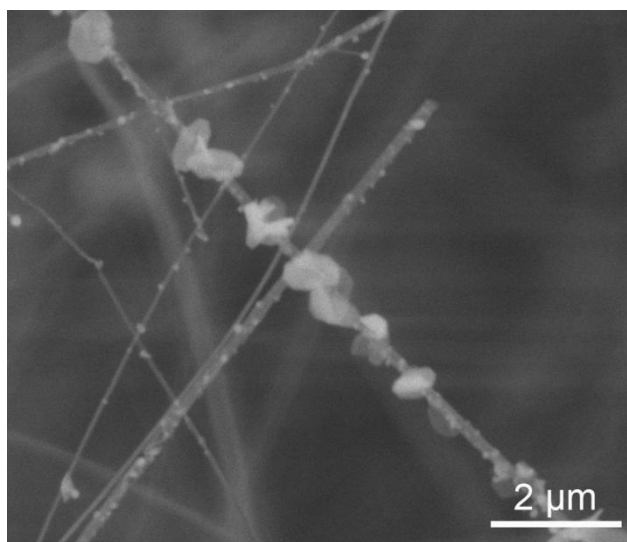

Fig. S1. SEM image showing the initial growth stage of the string-like ZnS/SnO nanostructures. The growth time in the second stage is 1 min.

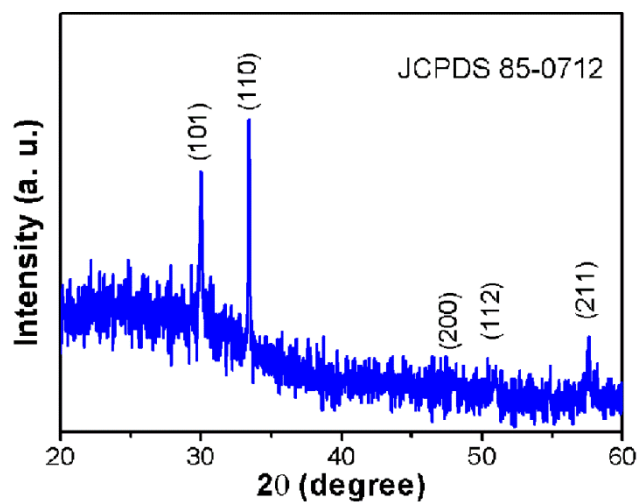

Fig. S2 XRD pattern of SnO nanosheets. The peaks are indexed according to tetragonal SnO (JCPDS 85-0712).

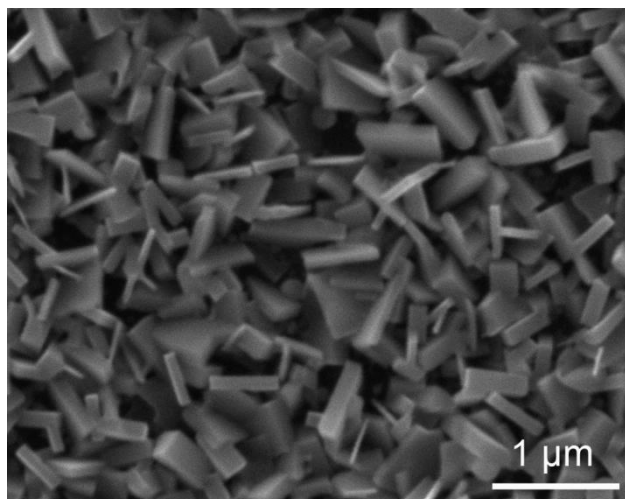

Fig. S3 SEM image of SnO nanosheets. The size of the nanosheets is almost the same with the nanosheets on the ZnS/SnO heterostructures.
